# Supplementary material for: The ubiquitin hybrid gene UBA52 regulates ubiquitination of ribosome and sustains embryonic development
Source: PubMed Central journal article supplement (PMC5103194; doi:10.1038/srep36780), 2016-11-10

The ubiquitin hybrid gene *UBA52* regulates ubiquitination of ribosome and sustains embryonic development

Masanori Kobayashi<sup>a</sup>, Shigeru Oshima<sup>a\*</sup>, Chiaki Maeyashiki<sup>a</sup>, Yoichi Nibe<sup>a</sup>, Kana Otsubo<sup>a</sup>, Yu Matsuzawa<sup>a</sup>, Yasuhiro Nemoto<sup>a</sup>, Takashi Nagaishi<sup>a</sup>, Ryuichi Okamoto<sup>a,b</sup>, Kiichiro Tsuchiya<sup>a</sup>, Tetsuya Nakamura<sup>c</sup>, and Mamoru Watanabe<sup>a</sup>

<sup>a</sup>Department of Gastroenterology and Hepatology, Graduate School, Tokyo Medical and Dental University (TMDU), Tokyo 113-8510, Japan

<sup>b</sup>Center for Stem Cell and Regenerative Medicine, Tokyo Medical and Dental University (TMDU), Tokyo 113-8510, Japan

<sup>c</sup>Department of Advanced Therapeutics for GI Diseases, Tokyo Medical and Dental University (TMDU), Tokyo 113-8510, Japan

\*Corresponding author: Shigeru Oshima, M.D., Ph.D., E-mail: [soshima.gast@tmd.ac.jp](mailto:soshima.gast@tmd.ac.jp)

Department of Gastroenterology and Hepatology

Tokyo Medical and Dental University (TMDU)

1-5-45, Yushima, Bunkyo-ku, Tokyo 113-8519, Japan

Phone No.: +81-3-5803-5877

Fax No.: +81-3-5803-0268

1B)

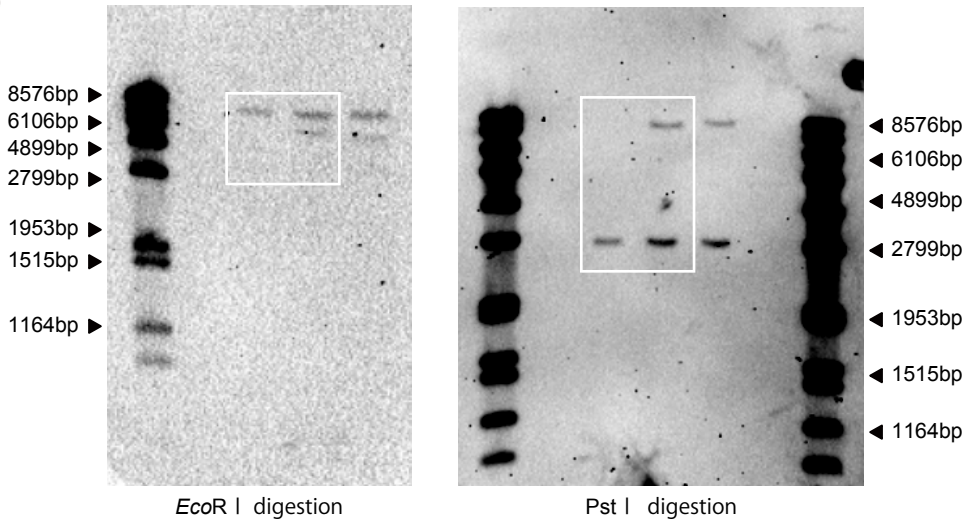

1C)

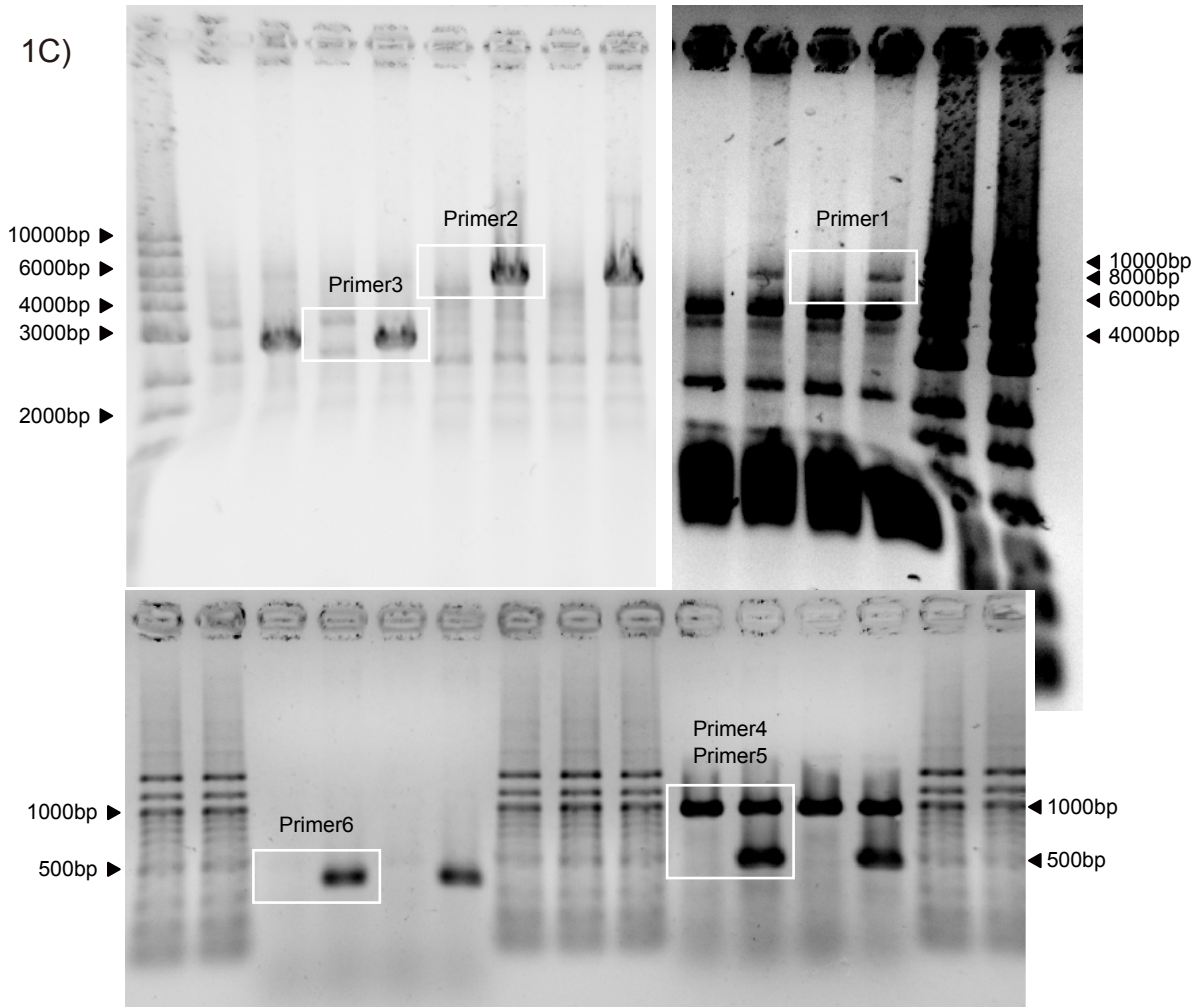

2B)

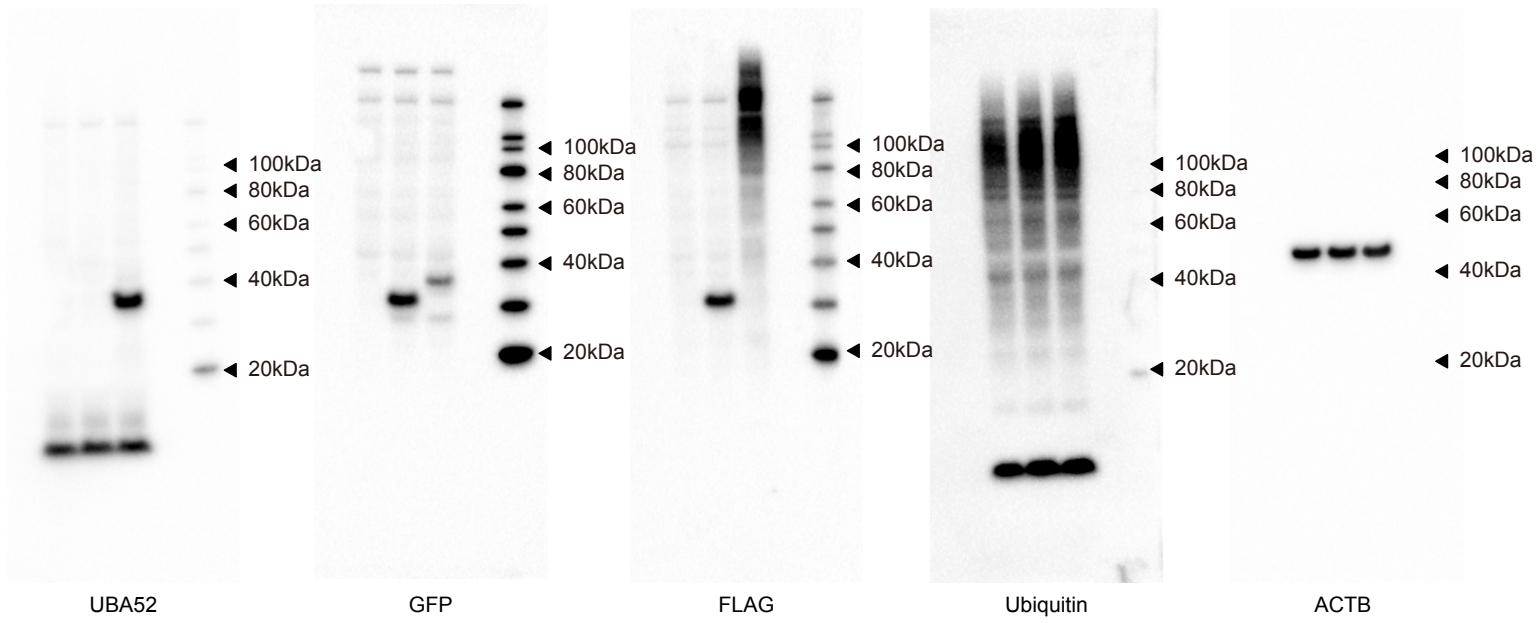

2C)

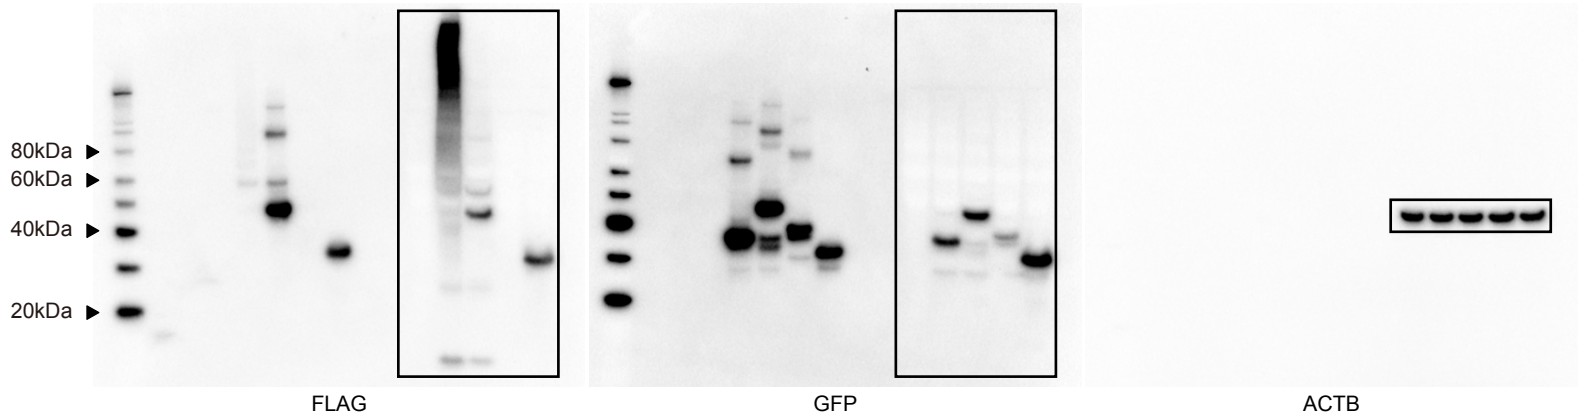

2E)

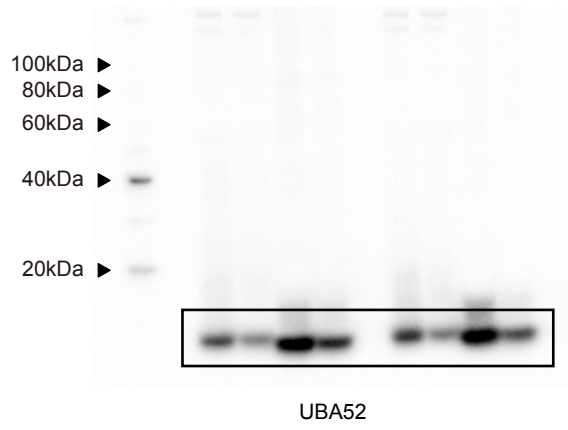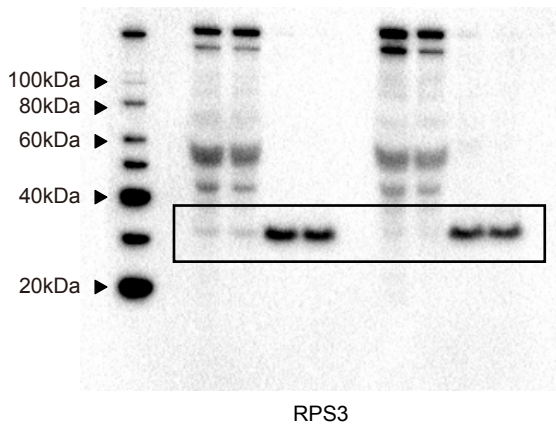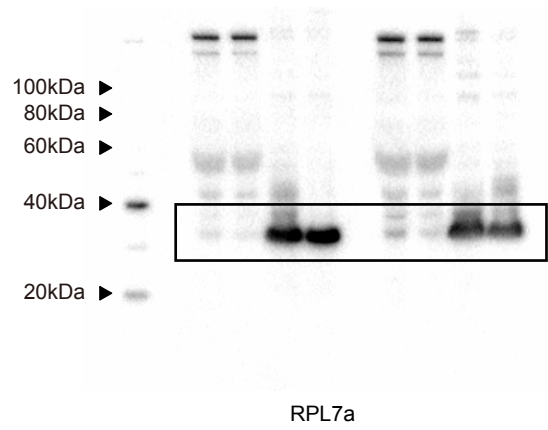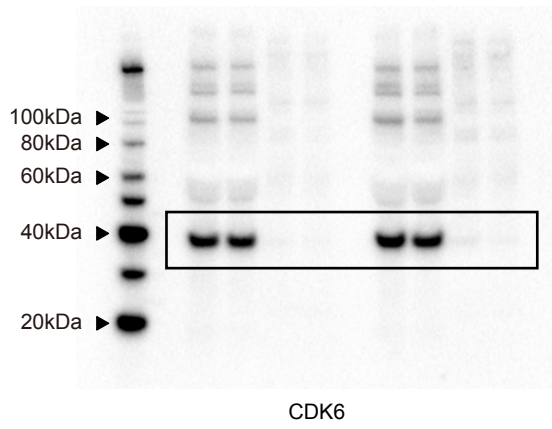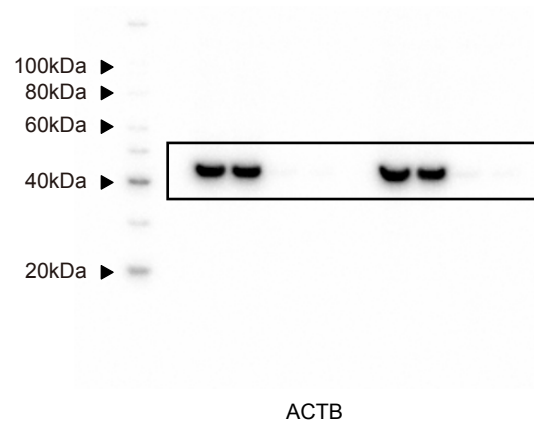

3E)

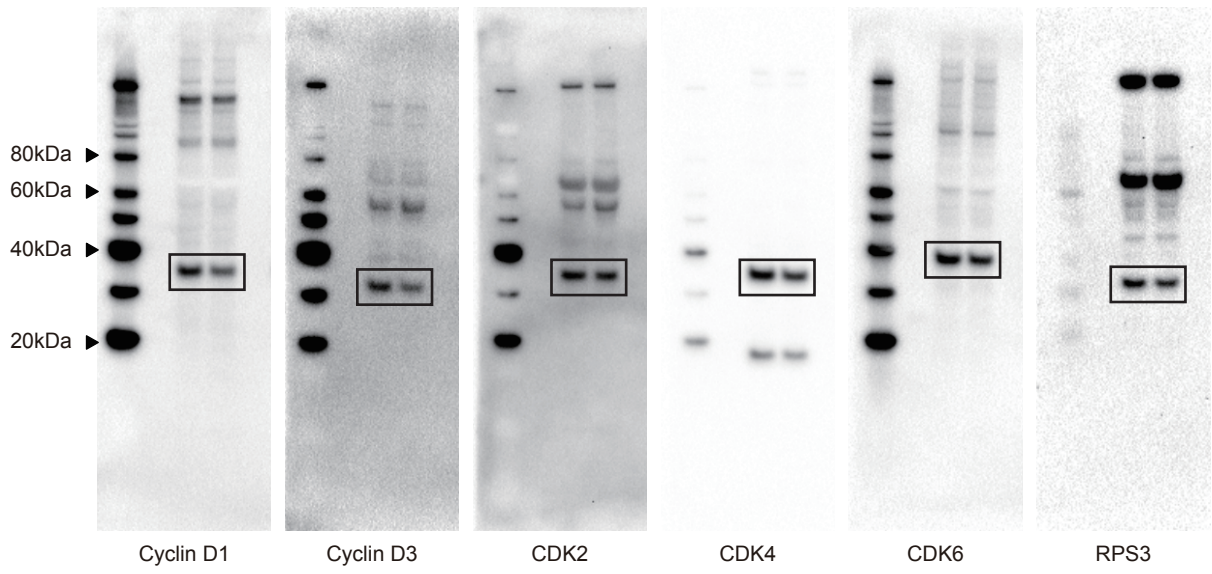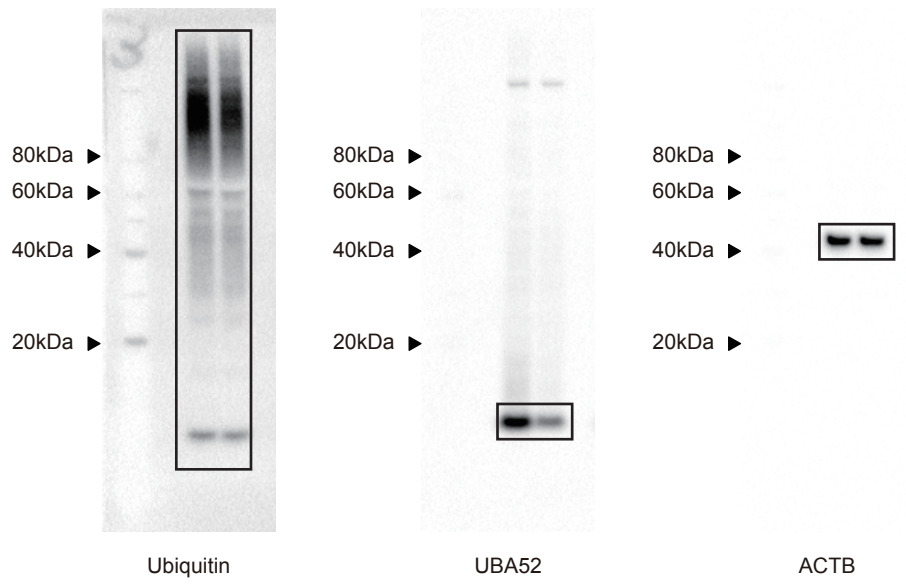

3G: DLD-1)

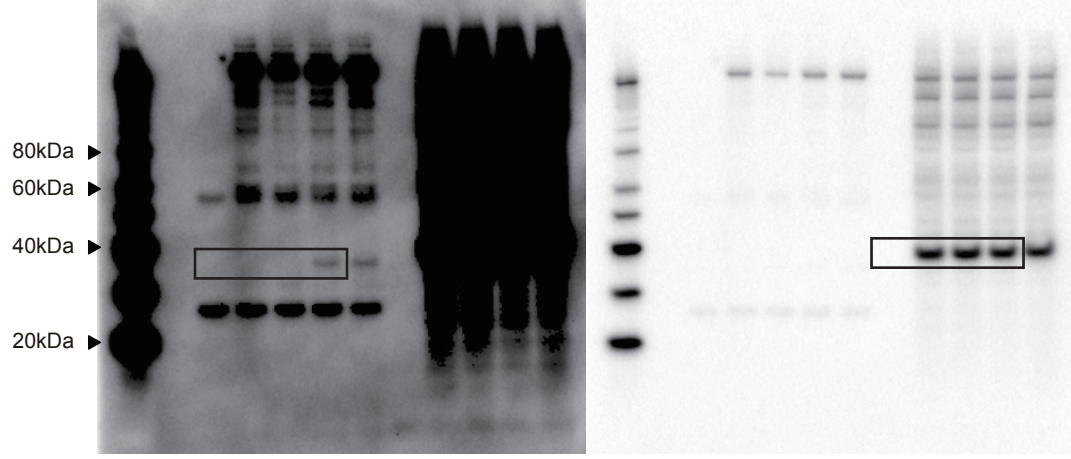

CDK6

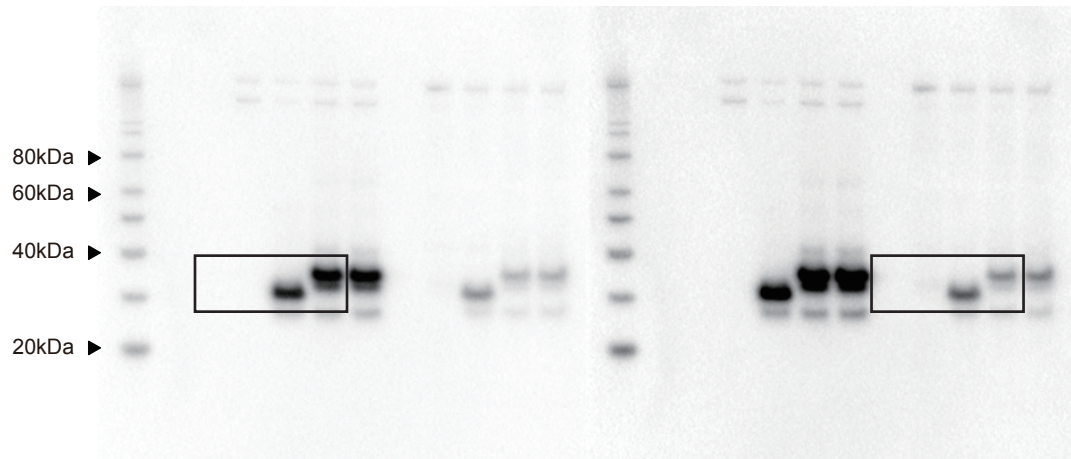

GFP

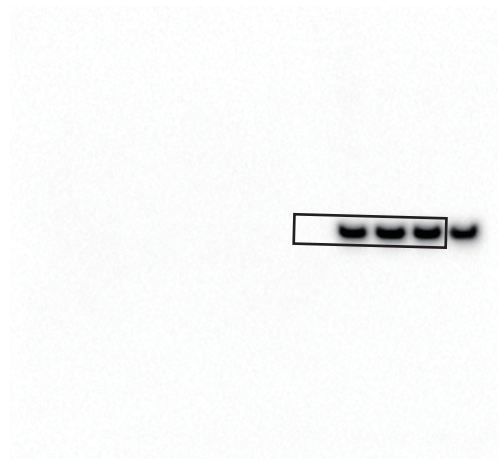

ACTB

3G: HEK293T)

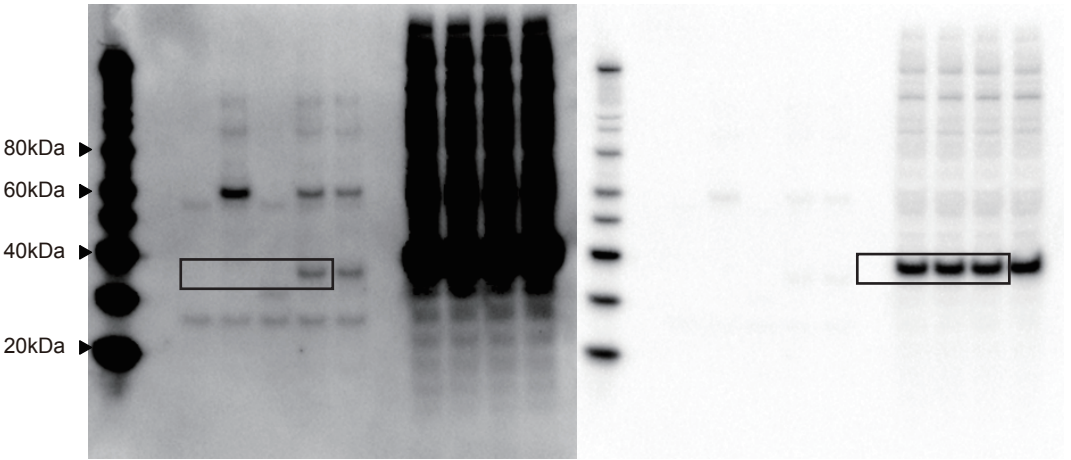

CDK6

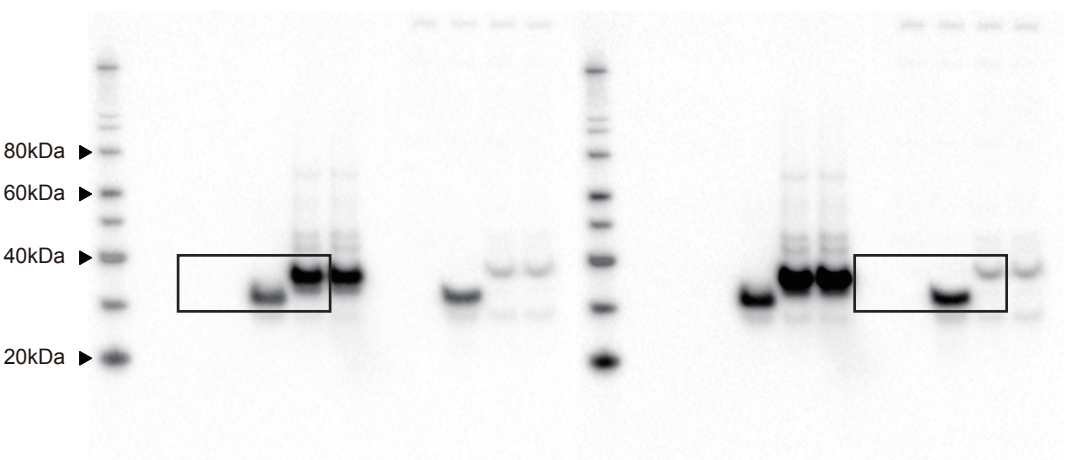

GFP

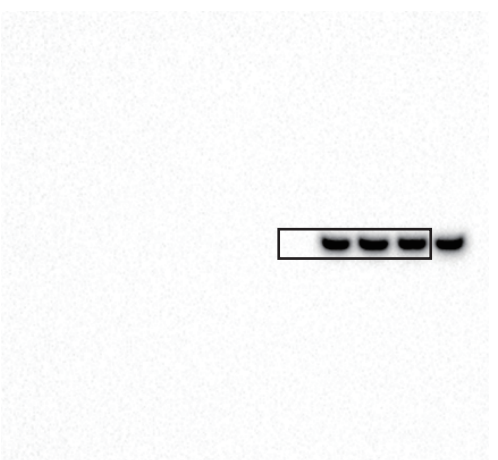

ACTB

3H)

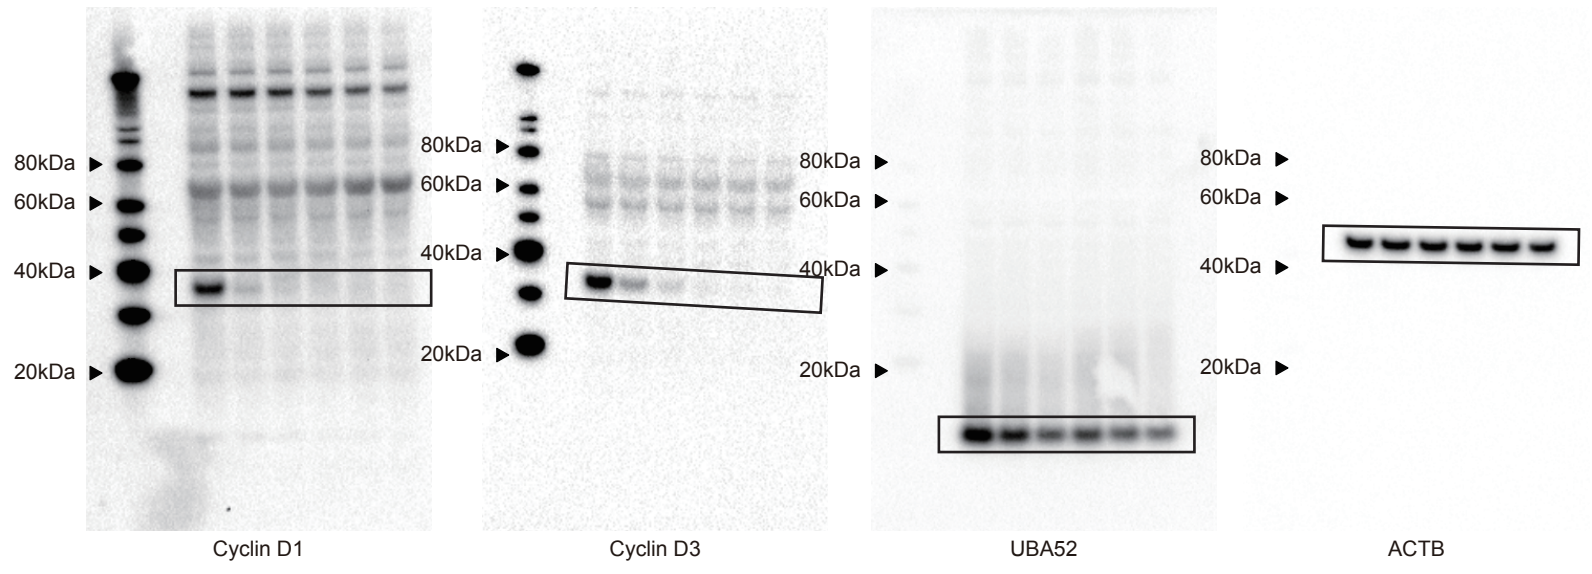

4A)

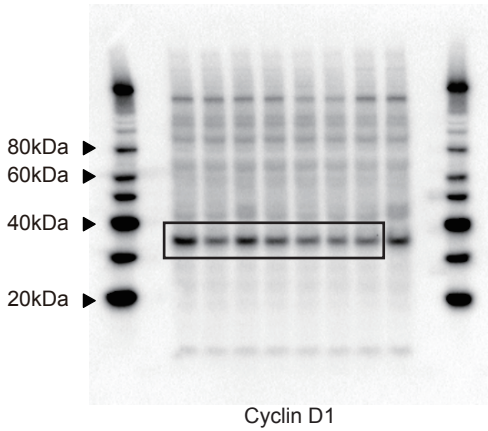

Cyclin D1

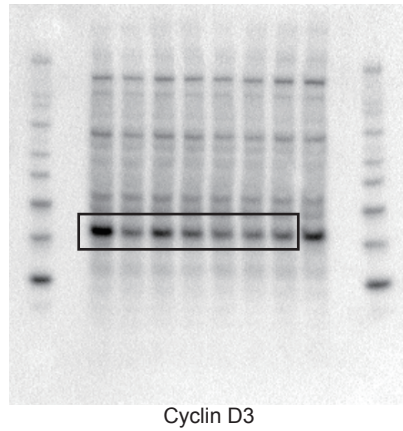

Cyclin D3

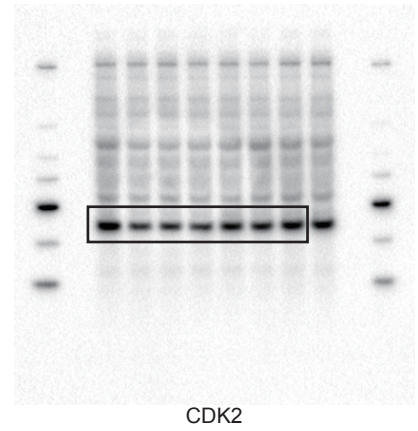

CDK2

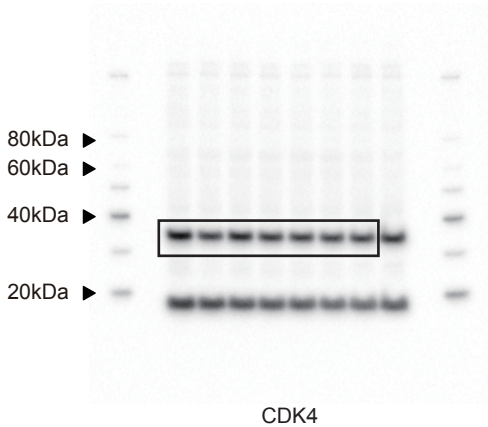

CDK4

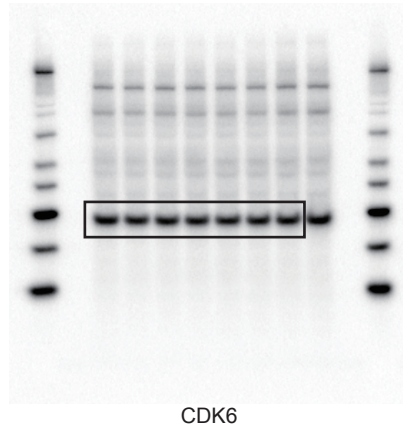

CDK6

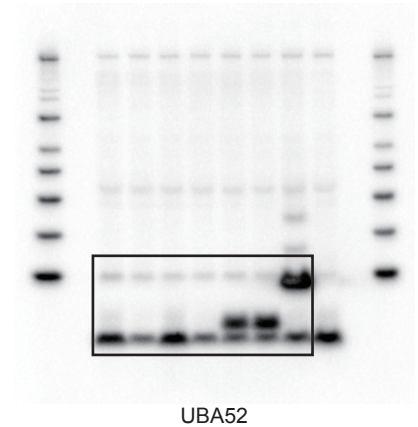

UBA52

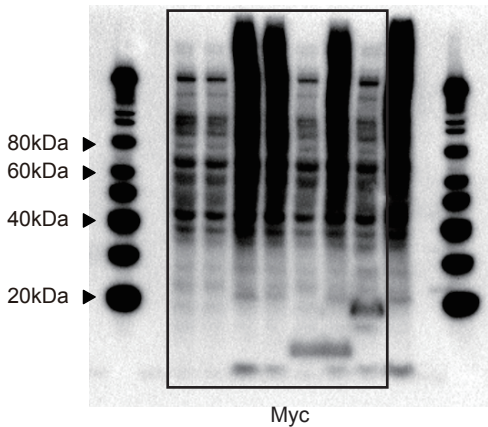

Myc

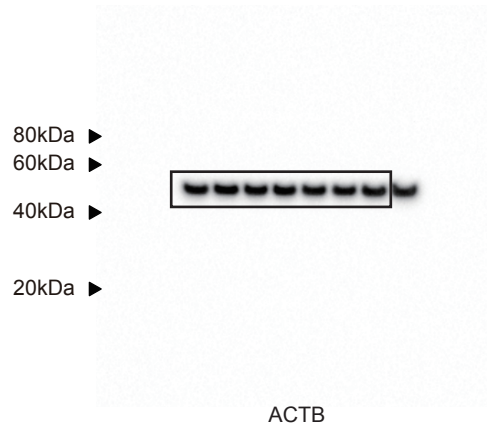

ACTB



4B)

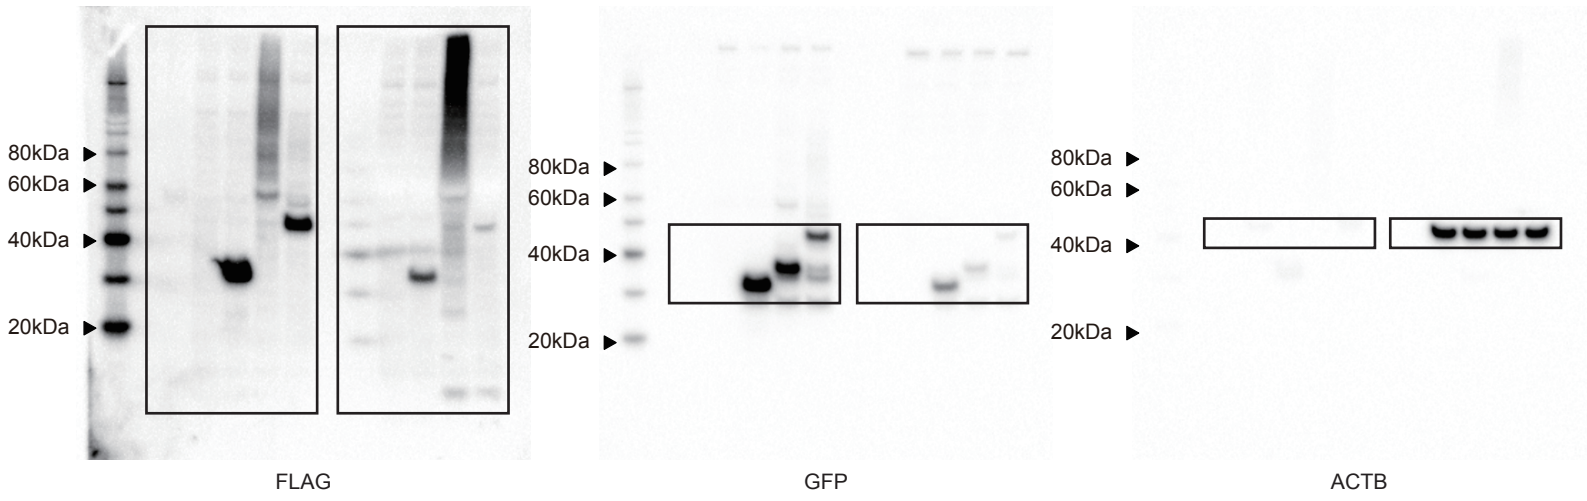

4C)

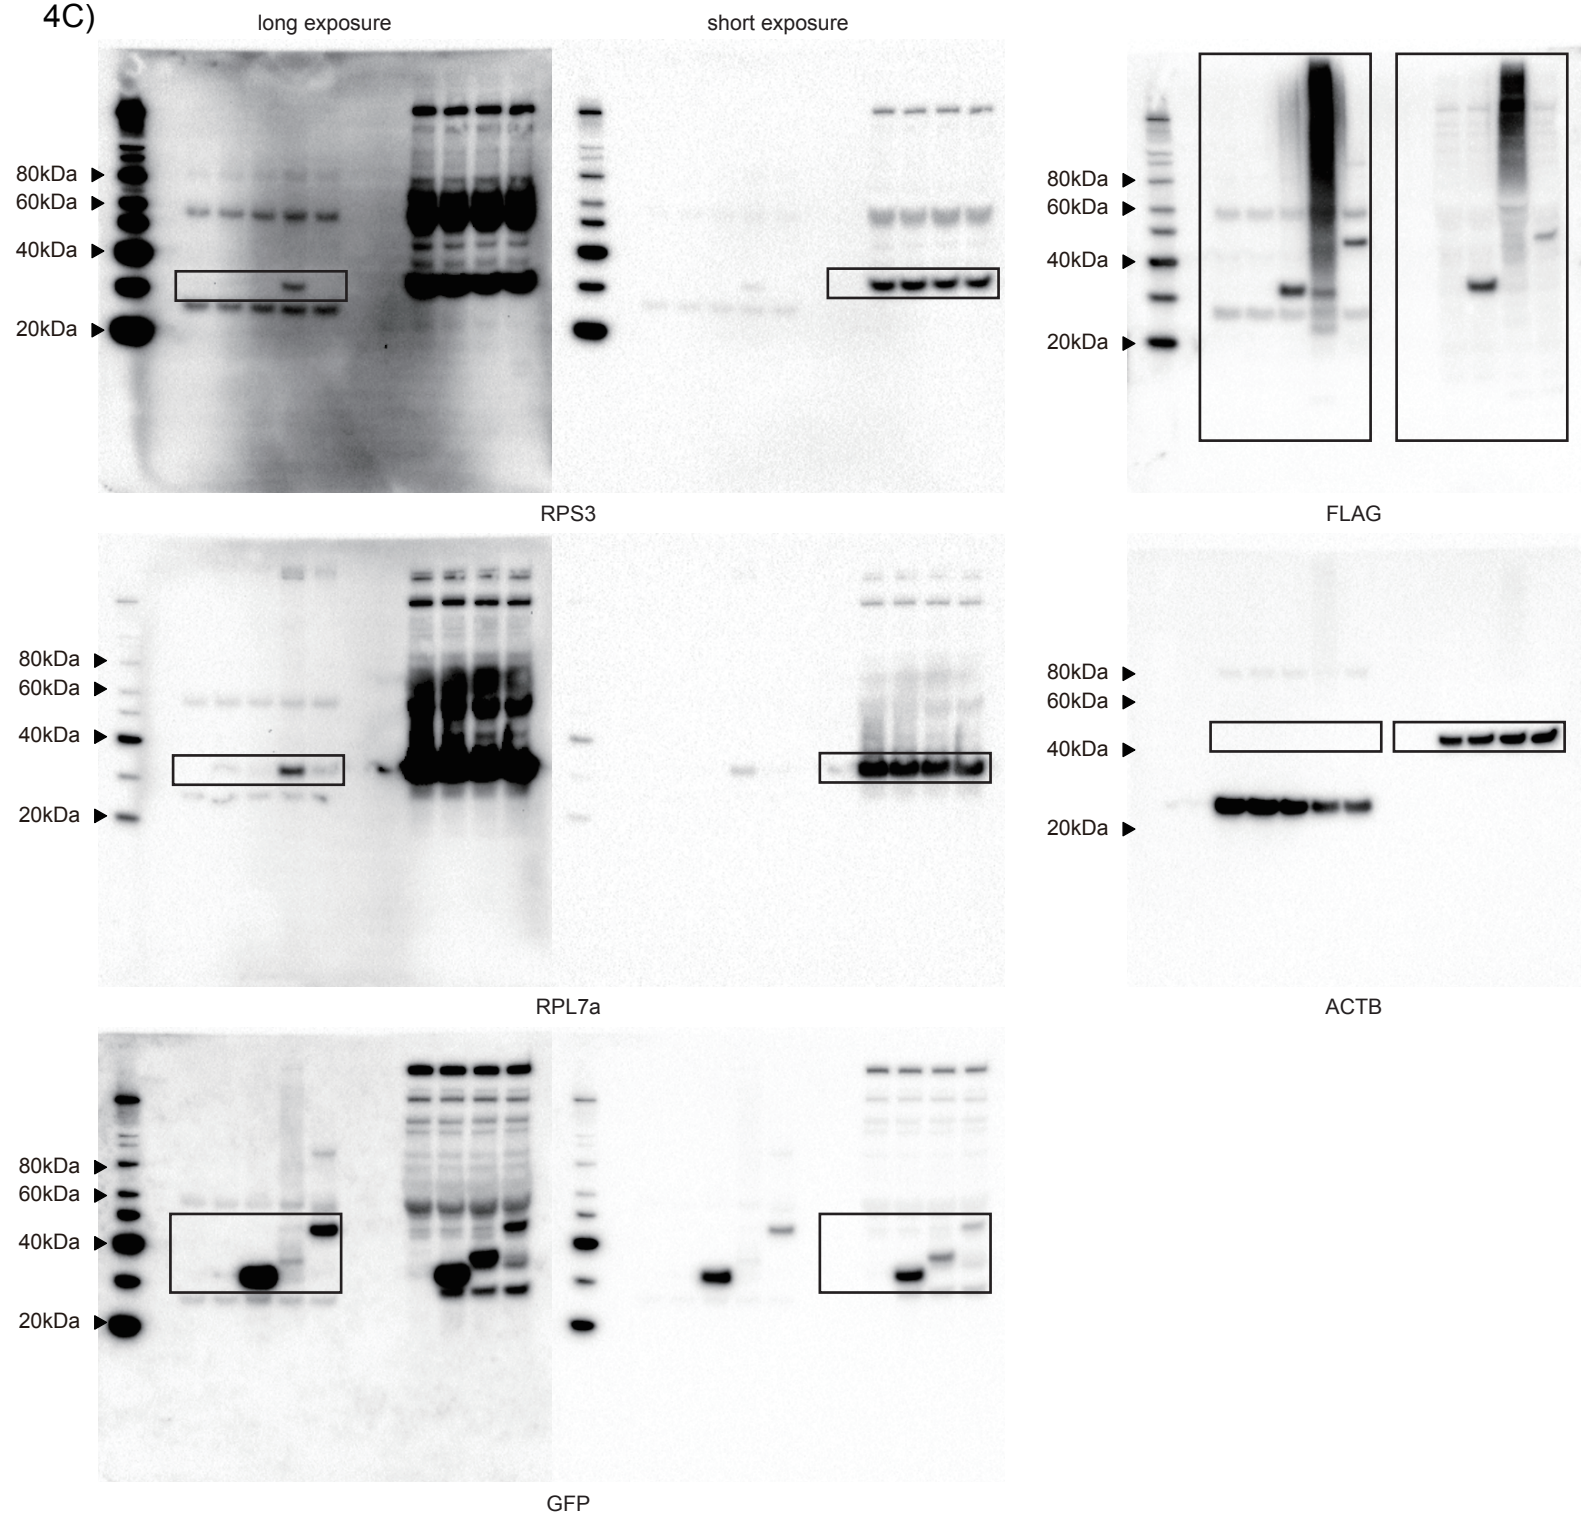

4D)

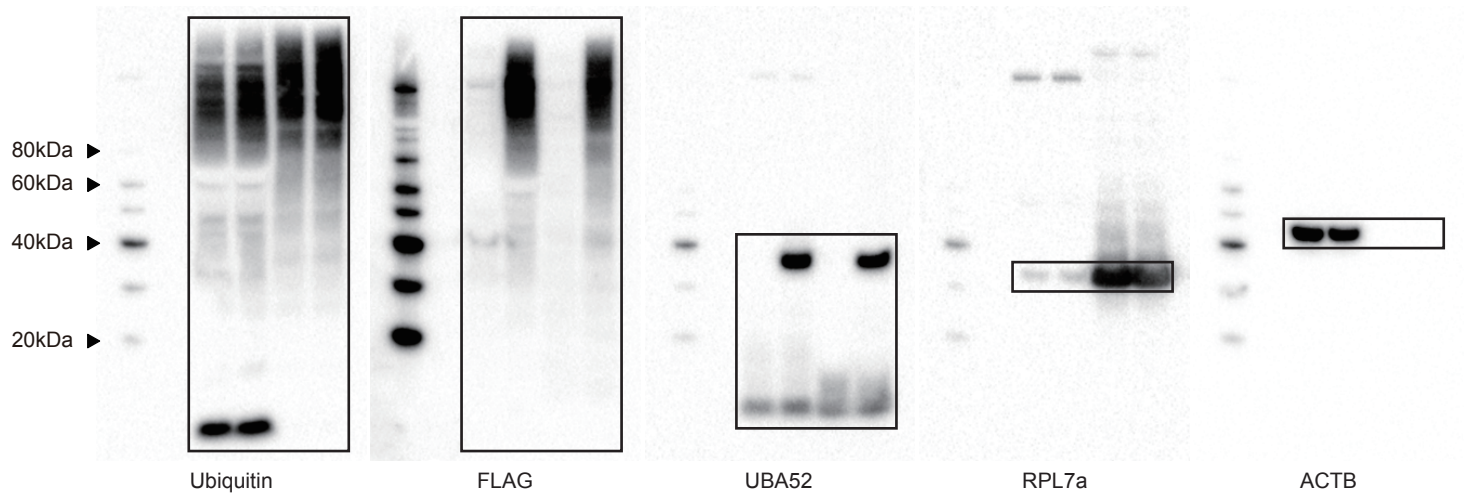

4E)

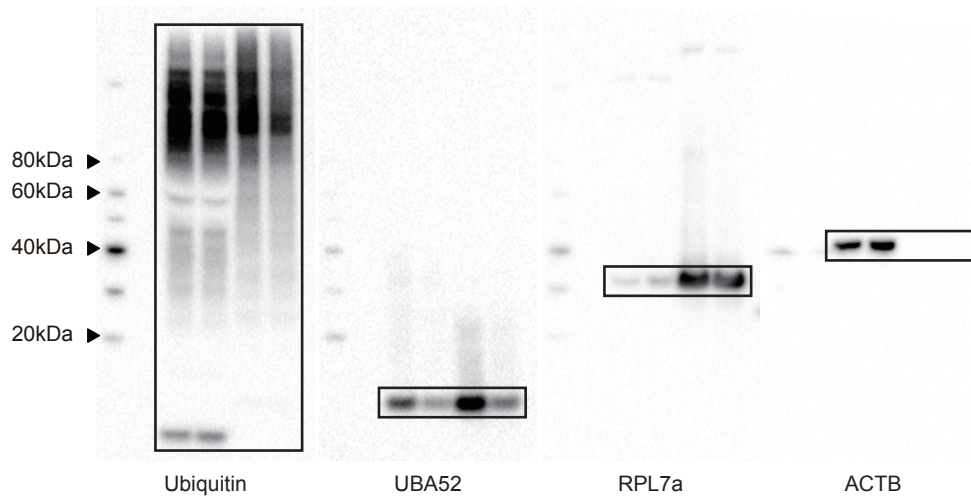

S1)

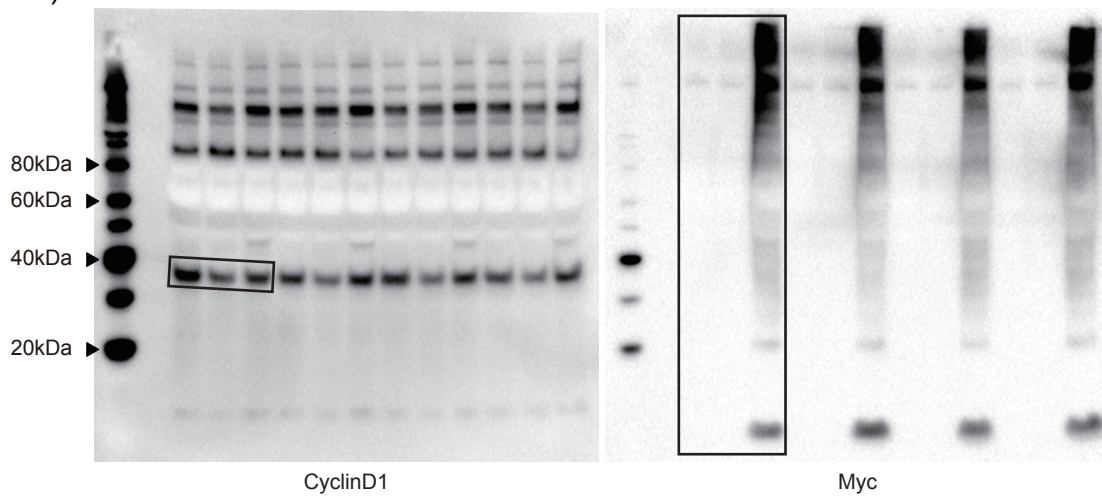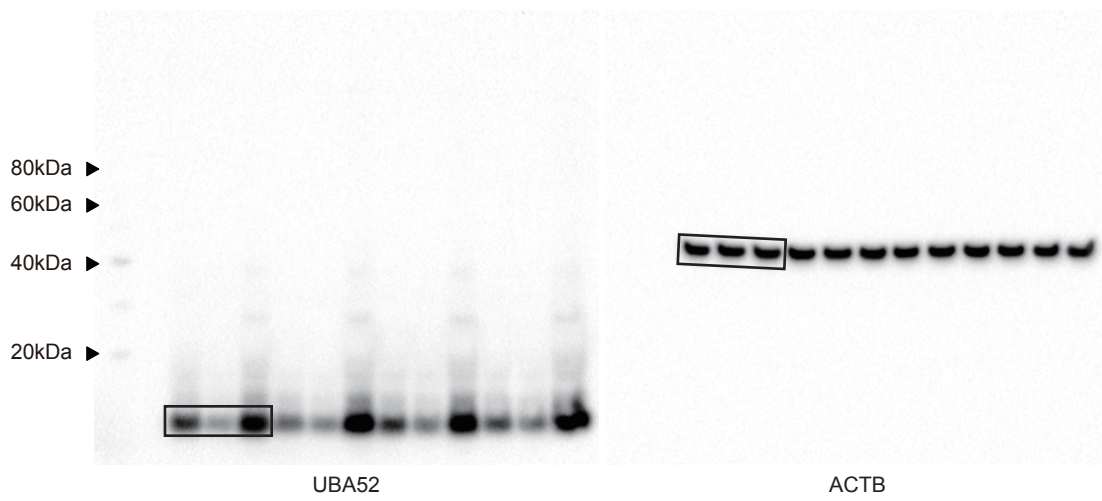

Supplement: srep36780-s2.pdf [file srep36780-s2.pdf]
