# Supplementary material for: The ubiquitin hybrid gene UBA52 regulates ubiquitination of ribosome and sustains embryonic development
Source: PubMed Central journal article supplement (PMC5103194; doi:10.1038/srep36780), 2016-11-10
Supplement: srep36780-s1.pdf [file srep36780-s1.pdf]

The ubiquitin hybrid gene *UBA52* regulates ubiquitination of ribosome and sustains embryonic development

Masanori Kobayashi<sup>a</sup>, Shigeru Oshima<sup>a\*</sup>, Chiaki Maeyashiki<sup>a</sup>, Yoichi Nibe<sup>a</sup>, Kana Otsubo<sup>a</sup>, Yu Matsuzawa<sup>a</sup>, Yasuhiro Nemoto<sup>a</sup>, Takashi Nagaishi<sup>a</sup>, Ryuichi Okamoto<sup>a,b</sup>, Kiichiro Tsuchiya<sup>a</sup>, Tetsuya Nakamura<sup>c</sup>, and Mamoru Watanabe<sup>a</sup>

<sup>a</sup>Department of Gastroenterology and Hepatology, Graduate School, Tokyo Medical and Dental University (TMDU), Tokyo 113-8510, Japan

<sup>b</sup>Center for Stem Cell and Regenerative Medicine, Tokyo Medical and Dental University (TMDU), Tokyo 113-8510, Japan

<sup>c</sup>Department of Advanced Therapeutics for GI Diseases, Tokyo Medical and Dental University (TMDU), Tokyo 113-8510, Japan

\*Corresponding author: Shigeru Oshima, M.D., Ph.D., E-mail: [soshima.gast@tmd.ac.jp](mailto:soshima.gast@tmd.ac.jp)

Department of Gastroenterology and Hepatology

Tokyo Medical and Dental University (TMDU)

1-5-45, Yushima, Bunkyo-ku, Tokyo 113-8519, Japan

Phone No.: +81-3-5803-5877

Fax No.: +81-3-5803-0268

S1)

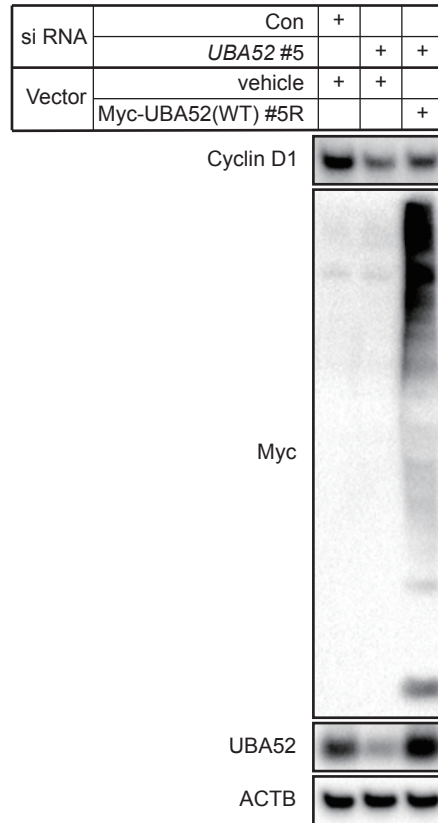

Supplementary Figure 1.

Myc-*UBA52* (WT) regulates cyclin D expression. DLD-1 cells were transfected with a *UBA52* #5 siRNA. After 6 h, DLD-1 cells were transfected with the siRNA-resistant vectors #5R indicated. Twenty-seven hours later, cells were harvested for immunoblotting. Data are representative of more than three independent experiments. Note that *UBA52*-deficient cell by #5 siRNA also displayed the decreased Cyclin D1 expression, and that Myc-*UBA52* (WT) #5R ameliorated the decreased expression of Cyclin D1
